# Supplementary material for: Individual Sensitization Pattern Recognition to Cow’s Milk and Human Milk Differs for Various Clinical Manifestations of Milk Allergy
Source: Nutrients. 2019 Jun 14;11(6):1331. doi: 10.3390/nu11061331 (PMC6628265; doi:10.3390/nu11061331)
Supplement: Supplementary file 1 [file nutrients-11-01331-s001.pdf]

ID7

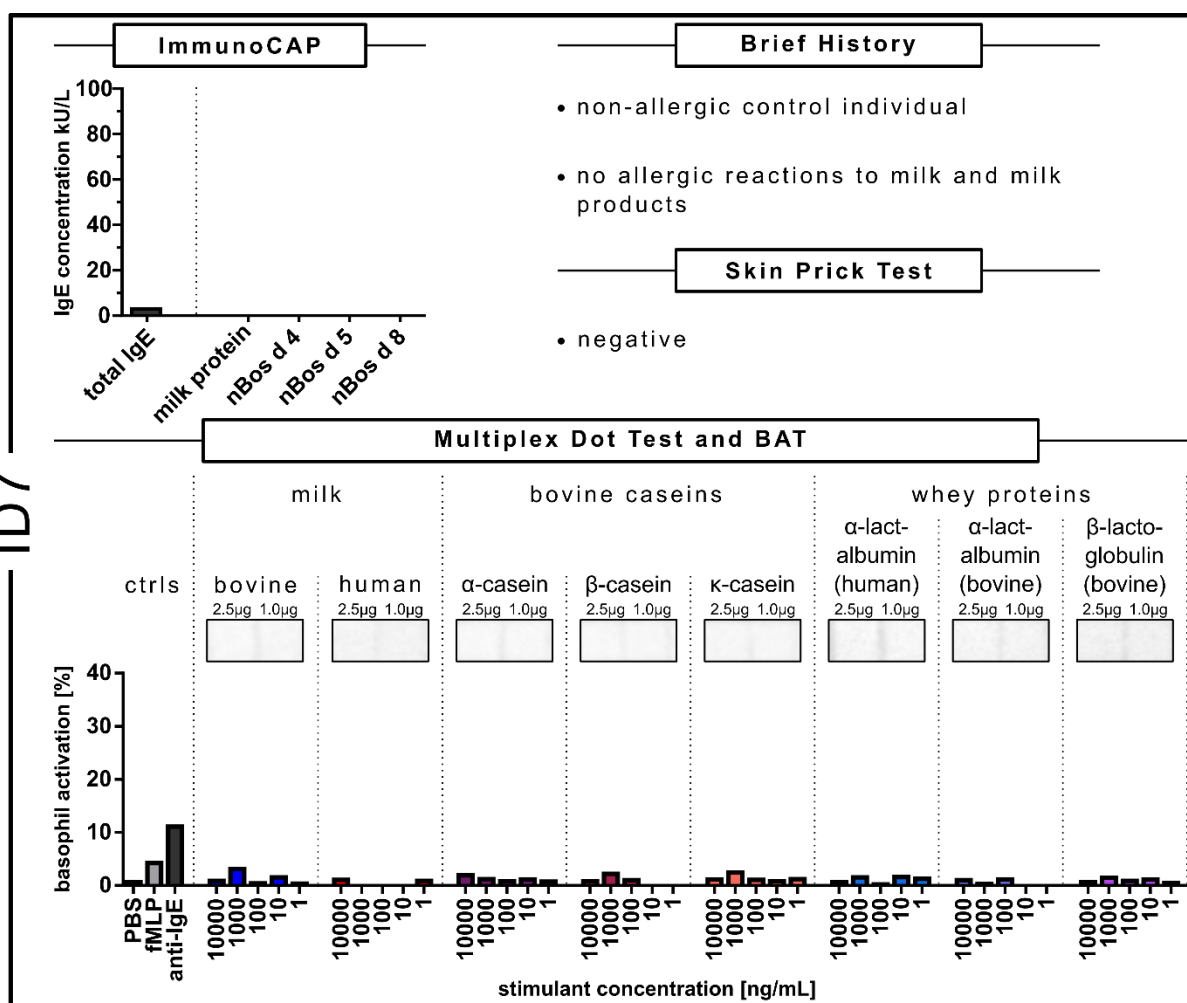

**Supplemental Figure S1. Synopsis of data of the non-allergic individual ID7 in the ImmunoCAP, Multiplex Dot Test and BAT.** CAP data of the negative control individual are depicted in a bar graph. Determination of IgE recognition to whole and single allergens of cow's milk and human milk in the multiplex dot test. The concentration of the dot-blotted analytes as indicated was 1.0  $\mu\text{g}/\mu\text{L}$  and 2.5  $\mu\text{g}/\mu\text{L}$  respectively. The BAT was performed with blood of the non-allergic control individual using whole cow's milk and human milk and single bovine and human milk allergens. Percentages represent CD63 positive basophils determined by flow cytometric analyses. Blood sample stimulation was conducted with the analytes as indicated. fMLP, anti-IgE were run as positive controls, PBS as negative control.



**Supplemental Figure S2.** Determination of IgE recognition of patients with CMA and a non-allergic individual in a Multiplex Dot Test. The concentration of the dot-blotted analytes as indicated was 1.0  $\mu\text{g}/\mu\text{L}$  and 2.5  $\mu\text{g}/\mu\text{L}$ , respectively.

**Supplemental Table S1 Summary of data for patients with milk allergy**

| Severity of symptoms             | Pat. ID | Sex | Age | SPT <sub>Milk</sub>                                    | IgE ImmunoCAP [kU/L]/CAP class |                    |                    |              |                      |                                  |                   |                   |                    |                    |                        |                          |                       | Symptoms to milk ingestion                                                                                                                                                                                                                                                                         |  |
|----------------------------------|---------|-----|-----|--------------------------------------------------------|--------------------------------|--------------------|--------------------|--------------|----------------------|----------------------------------|-------------------|-------------------|--------------------|--------------------|------------------------|--------------------------|-----------------------|----------------------------------------------------------------------------------------------------------------------------------------------------------------------------------------------------------------------------------------------------------------------------------------------------|--|
|                                  |         |     |     |                                                        |                                | Bovine milk        |                    |              |                      | Cheese and milk of other species |                   |                   |                    |                    | Single allergens       |                          |                       |                                                                                                                                                                                                                                                                                                    |  |
|                                  |         |     |     |                                                        | Total IgE [IU/mL]              | Milk prote in (f2) | Milk boiled (f231) | Whey (f236)  | Cheddar cheese (f81) | Mould cheese (f82)               | Ewe´s milk (f325) | Ewe´s whey (f326) | Goat´s milk (f300) | Mare´s milk (f286) | Bov. casein (nBos d 8) | β-lacto-glob. (nBos d 5) | α-lactalb. (nBos d 4) |                                                                                                                                                                                                                                                                                                    |  |
| Anaphylaxis/<br>Severe reactions | ID1     | M   | 30  | in early infancy;<br><br>recently contra-<br>indicated | 85.0                           | 34.90<br>(4)       | 38.00 (4)          | 33.60<br>(4) | 29.80 (4)            | 23.70 (4)                        | 30.60 (4)         | 25.80 (4)         | 32.00 (4)          | 2.55 (2)           | 31.30 (4)              | 8.86 (3)                 | 8.85 (3)              | Anaphylactic reactions since early childhood ((also to breast milk); cardioplegia after accidental intake of traces of milk. OIT since 2016.                                                                                                                                                       |  |
|                                  | ID2     | F   | 32  | recently contra-<br>indicated                          | 115.7                          | 1.32<br>(2)        | 1.24 (2)           | 0.91<br>(2)  | 1.26 (2)             | 0.63 (1)                         | 0.79 (2)          | 0.77 (2)          | 0.81 (2)           | negative<br>(0)    | 1.27 (2)               | negative<br>(0)          | negative (0)          | Skin reactions since early childhood (even as breast-fed child). Self-guided oral desensitization in 2008/2009, thereafter more severe reactions (urticaria, flush, asthmatic reactions, at first exercise-induced). After milk avoidance<br><br>anaphylactic reactions to minute amounts of milk. |  |
|                                  | ID2-1   |     |     |                                                        | 78.5                           | 0.79<br>(2)        | 0.81 (2)           | 0.59<br>(1)  | 0.75 (2)             | 0.35 (1)                         | 0.49 (1)          | 0.45 (1)          | 0.56 (1)           | <0.01 (0)          | 0.72 (2)               | 0.18 (0)                 | 0.17 (0)              |                                                                                                                                                                                                                                                                                                    |  |
|                                  | ID3     | F   | 9   | n.a. after 20 min;<br><br>no late reaction*            | 2096                           | 25.10<br>(4)       | 29.20 (4)          | 25.10<br>(4) | n.d.                 | n.d.                             | n.d.              | n.d.              | n.d.               | n.d.               | 19.50 (4)              | 0.61 (1)                 | 11.8 (3)              | Diagnosed milk allergy since 2010. <b>Severe reactions</b> at the skin and respiratory tract (cough, dyspnea)                                                                                                                                                                                      |  |
|                                  | ID3-1   |     |     |                                                        | >2500                          | 12.00<br>(3)       | 14.40 (3)          | 7.34<br>(3)  | 11.80 (3)            | 3.11 (2)                         | 7.34 (3)          | 7.92 (3)          | 9.58 (3)           | 3.61 (3)           | 12.80 (3)              | 0.31 (0)                 | 2.34 (2)              |                                                                                                                                                                                                                                                                                                    |  |
| No anaphylaxis                   | ID4     | F   | 26  | +                                                      | 379.0                          | 7.25<br>(3)        | 0.77 (2)           | 1.54<br>(2)  | 0.33 (0)             | 0.85 (2)                         | 1.15 (2)          | 1.86 (2)          | 0.63 (1)           | 0.37 (1)           | 0.62 (1)               | 0.34 (0)                 | 8.90 (3)              | Diagnosed milk allergy since 2016. Reactions (nausea, feeling of swelling of throat and troubles with swallowing)                                                                                                                                                                                  |  |
|                                  | ID4-1   |     |     |                                                        | 317.0                          | 10.90<br>(3)       | 0.87 (2)           | 1.97<br>(2)  | 0.32 (0)             | 0.86 (2)                         | 1.01 (2)          | 2.45 (2)          | 0.72 (2)           | 0.44 (1)           | 0.64 (1)               | 0.56 (1)                 | 9.19 (3)              | primarily exercise-induced. Different amounts of milk and milk products can be tolerated.                                                                                                                                                                                                          |  |
|                                  | ID5     | M   | 25  | +                                                      | 229.0                          | 1.09<br>(2)        | 0.97 (2)           | 0.46<br>(1)  | 0.43 (1)             | 0.23 (0)                         | 0.88 (2)          | 0.62 (1)          | 0.55 (1)           | 0.01 (0)           | 0.70 (1)               | n.d.                     | 0.20 (0)              | Diagnosed milk allergy since 2016. Nausea, feeling of tightness in esophagus/trachea.                                                                                                                                                                                                              |  |
|                                  | ID5-1   |     |     |                                                        | 185.0                          | 2.47<br>(2)        | 1.87 (2)           | 0.85<br>(2)  | 0.90 (2)             | 0.40 (1)                         | 1.67 (2)          | 1.18 (2)          | 1.24 (2)           | <0.01<br>(0)       | 1.57 (2)               | 1.46 (2)                 | 0.56 (1)              |                                                                                                                                                                                                                                                                                                    |  |
|                                  | ID6     | M   | 53  | +                                                      | 385.0                          | n.d.               | n.d.               | n.d.         | n.d.                 | n.d.                             | n.d.              | n.d.              | n.d.               | n.d.               | 0.82 (2)               | negative<br>(0))         | negative (0)          | Diagnosed milk allergy since 2000. Gastrointestinal symptoms, feeling of dysphagia and of chest pain (dyspnoe?)                                                                                                                                                                                    |  |
|                                  | ID6-1   |     |     |                                                        | 251.0                          | <0.01<br>(0)       | <0.01 (0)          | <0.01 (0)    | <0.01 (0)            | <0.01 (0)                        | <0.01 (0)         | <0.01 (0)         | <0.01 (0)          | <0.01 (0)          | <0.01 (0)              | <0.01 (0)                | <0.01 (0)             |                                                                                                                                                                                                                                                                                                    |  |
| Negative control                 | ID7     | F   | 55  | -                                                      | 3.0                            | <0.01<br>(0)       | <0.01 (0)          | <0.01<br>(0) | <0.01 (0)            | <0.01 (0)                        | <0.01 (0)         | <0.01 (0)         | <0.01 (0)          | <0.01 (0)          | <0.01 (0)              | <0.01 (0)                | <0.01 (0)             | No reactions to milk and milk products.                                                                                                                                                                                                                                                            |  |

SPT: Skin Prick Test; n.a. not available; n.d. not determined; \*ID3 is a child with a food allergy triggered atopic eczema, which is why the late reaction to SPT was documented.  
This child was positive in a titrated oral challenge with cow's milk (urticaria); +. positive; -: negative

|                                  | Pat.<br>ID | Other sensitizations**                                                  |                                                             | Other allergic symptoms                                                                                                                       |
|----------------------------------|------------|-------------------------------------------------------------------------|-------------------------------------------------------------|-----------------------------------------------------------------------------------------------------------------------------------------------|
|                                  |            | Aeroallergens                                                           | Foods                                                       |                                                                                                                                               |
| Anaphylaxis/<br>Severe reactions | ID1        | -                                                                       | -                                                           | Allergic asthma; hazelnut, peanut sensitization in childhood                                                                                  |
|                                  | ID2        | Hazel, birch, grass pollen, HDM                                         | Egg, peanut, hazelnut, fish, cashew, pistachio, seafood     | Atopic dermatitis since infancy, allergic asthma since early childhood, allergic rhinoconjunctivitis, severe reactions (systematic reactions) |
|                                  | ID3        | n.d.                                                                    | Peanut, egg, soy, hazelnut, almond, lupine, sunflower seeds | Allergic asthma, atopic dermatitis, severe reactions (systemic reactions)                                                                     |
| No anaphylaxis                   | ID4        | rPhl p1, rPhl p 5 (grass pollen)                                        | Egg, celery, hazelnut, apple, carrot, tomato                | Allergic rhinoconjunctivitis, OAS                                                                                                             |
|                                  | ID5        | Rye, birch (t3), rBet v 1 (t213), rPhl p1, rPhl p 5 (grass pollen), HDM | Egg, celery, hazelnut, apple, carrot, tomato                | Allergic rhinoconjunctivitis, asthma                                                                                                          |
|                                  | ID6        | Rye, birch, grass, hasel, HDM                                           | none                                                        | Allergic rhinoconjunctivitis.                                                                                                                 |
| Negative control                 | ID7        | none                                                                    | none                                                        | none                                                                                                                                          |

n.d.: not determined; \*\*: determined by SPT or IgE ImmunoCAP; OAS: Oral Allergy Syndrome; HDM: House dust mite
